# Supplementary material for: Unwelcome memento mori or best clinical practice? Community end of life anticipatory medication prescribing practice: A mixed methods observational study
Source: PubMed Central journal article supplement (PMC8796157; doi:10.1177/02692163211043382), 2021-09-08
Supplement: sj-pdf-2-pmj-10.1177_02692163211043382.pdf [file sj-pdf-2-pmj-10.1177_02692163211043382.pdf]

**Supplementary Document 2: Multivariable Logistic Regression**

**Supplementary Table 1. Prescribing of anticipatory medication: Multivariable Logistic Regression**

| Step 3a.                                            | B      | SE    | Wald   | df | Sig.  | Exp (B) | 95% CI for Exp (B) |        |
|-----------------------------------------------------|--------|-------|--------|----|-------|---------|--------------------|--------|
|                                                     |        |       |        |    |       |         | Lower              | Upper  |
| <b>Gender</b> (female vs. male)                     | -0.091 | 0.382 | 0.057  | 1  | 0.811 | 0.913   | 0.431              | 1.931  |
| <b>Age Range</b> (vs. 85+), years                   |        |       | 2.426  | 3  | 0.489 |         |                    |        |
| 18-64                                               | -1.005 | 0.657 | 2.342  | 1  | 0.126 | 0.366   | 0.101              | 1.326  |
| 65-74                                               | -0.505 | 0.625 | 0.652  | 1  | 0.419 | 0.603   | 0.177              | 2.056  |
| 75-84                                               | -0.213 | 0.511 | 0.174  | 1  | 0.677 | 0.808   | 0.297              | 2.199  |
| <b>GP Practice ID No.</b><br>Reference = No. Eleven |        |       | 12.366 | 10 | 0.261 |         |                    |        |
| One                                                 | 0.19   | 0.903 | 0.044  | 1  | 0.833 | 1.209   | 0.206              | 7.102  |
| Two                                                 | 0.554  | 0.973 | 0.324  | 1  | 0.569 | 1.74    | 0.259              | 11.714 |
| Three                                               | 0.193  | 0.917 | 0.044  | 1  | 0.833 | 1.213   | 0.201              | 7.32   |
| Four                                                | 2.632  | 1.099 | 5.738  | 1  | 0.017 | 13.9    | 1.614              | 119.75 |
| Five                                                | 0.812  | 0.919 | 0.78   | 1  | 0.377 | 2.252   | 0.372              | 13.634 |
| Six                                                 | -0.288 | 0.891 | 0.104  | 1  | 0.747 | 0.75    | 0.131              | 4.302  |
| Seven                                               | 0.659  | 0.898 | 0.539  | 1  | 0.463 | 1.934   | 0.332              | 11.249 |
| Eight                                               | 1.093  | 0.965 | 1.283  | 1  | 0.257 | 2.982   | 0.45               | 19.764 |
| Nine                                                | 1.03   | 0.99  | 1.083  | 1  | 0.298 | 2.802   | 0.402              | 19.515 |

|                                                             |        |       |        |   |       |        |       |        |
|-------------------------------------------------------------|--------|-------|--------|---|-------|--------|-------|--------|
| Ten                                                         | -0.345 | 0.996 | 0.12   | 1 | 0.729 | 0.708  | 0.101 | 4.986  |
| <b>Number of chronic disease registers on (vs. 8-13)</b>    |        |       | 1.745  | 4 | 0.783 |        |       |        |
| 0-1                                                         | -0.394 | 0.886 | 0.197  | 1 | 0.657 | 0.674  | 0.119 | 3.833  |
| 2-3                                                         | -0.225 | 0.715 | 0.099  | 1 | 0.753 | 0.799  | 0.197 | 3.244  |
| 4-5                                                         | -0.339 | 0.726 | 0.218  | 1 | 0.64  | 0.712  | 0.172 | 2.954  |
| 6-7                                                         | 0.474  | 0.843 | 0.317  | 1 | 0.574 | 1.607  | 0.308 | 8.378  |
| <b>Usual Place of Residence (care home vs. home)</b>        | -0.023 | 0.699 | 0.001  | 1 | 0.974 | 0.977  | 0.248 | 3.842  |
| <b>Cause of Death (cancer vs. non-cancer)</b>               | 0.27   | 0.517 | 0.273  | 1 | 0.601 | 1.31   | 0.475 | 3.61   |
| <b>Preferred Place of Death (recorded vs. not recorded)</b> | 3.533  | 0.416 | 72.266 | 1 | 0.000 | 34.238 | 15.16 | 77.322 |
| <b>Received Specialist Palliative Care (yes vs. no)</b>     | 1.96   | 0.492 | 15.902 | 1 | 0.000 | 7.101  | 2.71  | 18.611 |
| Constant                                                    | -3.028 | 1.107 | 7.49   | 1 | 0.006 | 0.048  |       |        |

a. Variables entered: Gender, Age Range, GP Practice, Number Chronic Disease Register Groups, Usual Residence,

**Cause of Death, Preferred Place of Death, Seen Specialist Palliative Care. Steps 1-3 are detailed in the Supplemental Document 3.**
