# Supplementary material for: Unwelcome memento mori or best clinical practice? Community end of life anticipatory medication prescribing practice: A mixed methods observational study
Source: PubMed Central journal article supplement (PMC8796157; doi:10.1177/02692163211043382), 2021-09-08
Supplement: sj-pdf-3-pmj-10.1177_02692163211043382.pdf [file sj-pdf-3-pmj-10.1177_02692163211043382.pdf]

Supplementary Document 3: Multivariable Logistic Regression Steps 1-3

Supplementary Table 2. Prescribing of anticipatory medication: Multivariable Logistic Regression Steps 1-3

| Variable                                      | Step 1 / Model 1                    |       |       |        | Step 2 / Model 2                     |       |       |        | Step 3 / Model 3                     |       |       |        |
|-----------------------------------------------|-------------------------------------|-------|-------|--------|--------------------------------------|-------|-------|--------|--------------------------------------|-------|-------|--------|
|                                               | B                                   | SE    | Sig.  | OR     | B                                    | SE    | Sig.  | OR     | B                                    | SE    | Sig.  | OR     |
| Constant                                      | .478                                | .697  | 0.493 | 1.613  | -2.405                               | 1.009 | .017  | .090   | -3.028                               | 1.107 | 0.006 | 0.048  |
| <b>Gender</b>                                 |                                     |       |       |        |                                      |       |       |        |                                      |       |       |        |
| Female<br>(base = male)                       | -.070                               | .265  | 0.791 | .932   | -0.021                               | .363  | 0.953 | .979   | -0.091                               | 0.382 | 0.811 | 0.913  |
| <b>Age Range, years</b>                       |                                     |       | 0.120 |        |                                      |       | 0.775 |        |                                      |       | 0.489 |        |
| 18-64                                         | -0.821                              | .440  | 0.062 | 0.44   | -0.57                                | 0.611 | 0.351 | 0.566  | -1.005                               | 0.657 | 0.126 |        |
| 65-74                                         | -0.548                              | .405  | 0.176 | 0.578  | -0.023                               | 0.561 | 0.967 | 0.977  | -0.505                               | 0.625 | 0.419 |        |
| 75-84<br>(base = 85+)                         | -0.775                              | .355  | 0.029 | 0.461  | -0.057                               | 0.487 | 0.908 | 0.945  | -0.213                               | 0.511 | 0.677 |        |
| <b>GP Practice ID No.</b>                     |                                     |       | 0.003 |        |                                      |       | 0.242 |        |                                      |       | 0.261 |        |
| One                                           | -0.905                              | .603  | 0.133 | 0.405  | -0.295                               | 0.811 | 0.717 | 0.745  | 0.19                                 | 0.903 | 0.833 | 1.209  |
| Two                                           | -0.508                              | .606  | 0.402 | 0.602  | 0.381                                | 0.837 | 0.649 | 1.464  | 0.554                                | 0.973 | 0.569 | 1.74   |
| Three                                         | -0.375                              | .598  | 0.531 | 0.687  | -0.016                               | 0.82  | 0.984 | 0.984  | 0.193                                | 0.917 | 0.833 | 1.213  |
| Four                                          | 2.989                               | .882  | 0.001 | 19.872 | 2.747                                | 1.099 | 0.012 | 15.597 | 2.632                                | 1.099 | 0.017 | 13.9   |
| Five                                          | 0.282                               | .640  | 0.659 | 1.326  | 0.631                                | 0.846 | 0.456 | 1.88   | 0.812                                | 0.919 | 0.377 | 2.252  |
| Six                                           | -0.193                              | .600  | 0.747 | 0.824  | -0.472                               | 0.782 | 0.546 | 0.624  | -0.288                               | 0.891 | 0.747 | 0.75   |
| Seven                                         | -0.255                              | .586  | 0.663 | 0.775  | 0.255                                | 0.833 | 0.759 | 1.291  | 0.659                                | 0.898 | 0.463 | 1.934  |
| Eight                                         | -0.365                              | .593  | 0.538 | 0.694  | 0.646                                | 0.869 | 0.458 | 1.907  | 1.093                                | 0.965 | 0.257 | 2.982  |
| Nine                                          | -0.518                              | .598  | 0.386 | 0.595  | 0.607                                | 0.856 | 0.478 | 1.835  | 1.03                                 | 0.99  | 0.298 | 2.802  |
| Ten<br>(base = No. Eleven)                    | -1.211                              | .629  | 0.054 | 0.298  | -0.428                               | 0.875 | 0.625 | 0.652  | -0.345                               | 0.996 | 0.729 | 0.708  |
| <b>Number of chronic disease registers on</b> |                                     |       | 0.017 |        |                                      |       | 0.669 |        |                                      |       | 0.783 |        |
| 0-1                                           | -1.647                              | .650  | 0.011 | 0.65   | -0.727                               | 0.871 | 0.404 | 0.483  | -0.394                               | 0.886 | 0.657 | 0.674  |
| 2-3                                           | -0.602                              | .529  | 0.255 | 0.529  | -0.404                               | 0.724 | 0.577 | 0.668  | -0.225                               | 0.715 | 0.753 | 0.799  |
| 4-5                                           | -0.393                              | .534  | 0.462 | 0.534  | -0.51                                | 0.734 | 0.487 | 0.6    | -0.339                               | 0.726 | 0.64  | 0.712  |
| 6-7<br>(base = 8-13)                          | 0.293                               | .596  | 0.623 | 0.596  | 0.287                                | 0.831 | 0.73  | 1.333  | 0.474                                | 0.843 | 0.574 | 1.607  |
| <b>Usual Place of Residence</b>               |                                     |       |       |        |                                      |       |       |        |                                      |       |       |        |
| Care Home<br>(base = home)                    | -0.471                              | 0.515 | 0.36  | 0.624  | -0.16                                | 0.721 | 0.825 | 0.852  | -0.023                               | 0.699 | 0.974 | 0.977  |
| <b>Cause of Death</b>                         |                                     |       |       |        |                                      |       |       |        |                                      |       |       |        |
| Cancer<br>(base = non-cancer)                 | 1.861                               | 0.311 | .000  | 6.429  | 1.177                                | 0.424 | 0.005 | 3.243  | 0.27                                 | 0.517 | 0.601 | 1.31   |
| <b>Preferred Place of Death</b>               |                                     |       |       |        |                                      |       |       |        |                                      |       |       |        |
| Recorded<br>(base = not recorded)             |                                     |       |       |        | 3.799                                | 0.398 | .000  | 44.679 | 3.533                                | 0.416 | .000  | 34.238 |
| <b>Received Specialist Palliative Care</b>    |                                     |       |       |        |                                      |       |       |        |                                      |       |       |        |
| Yes                                           |                                     |       |       |        |                                      |       |       |        | 1.96                                 | 0.492 | .000  | 7.101  |
| <b>- 2 Log likelihood</b>                     | 358.281                             |       |       |        | 220.223                              |       |       |        | 202.562                              |       |       |        |
|                                               | X2 = 97.734,<br>df = 20,<br>p <.001 |       |       |        | X2 = 235.791,<br>df = 21,<br>p <.001 |       |       |        | X2 =<br>253.453, df =<br>22, p <.001 |       |       |        |
| Nagelkerke R2                                 | .343                                |       |       |        | .682                                 |       |       |        | .716                                 |       |       |        |
| Hosmer and Lemeshow Test                      | p = 0.639                           |       |       |        | p = 0.912                            |       |       |        | p = 0.430                            |       |       |        |
| Classification accuracy                       | 72.9%                               |       |       |        | 87.2%                                |       |       |        | 88.8%                                |       |       |        |
